# Supplementary material for: Effect of support on selectivity and on-stream stability of surface VOx species in non-oxidative propane dehydrogenation
Source: Royal Society of Chemistry journal article supplement (doi:10.1039/c3cy01083j), 2014-01-01
Supplement: c3cy01083j1.pdf [file c3cy01083j1.pdf]

## Electronic Supplementary Information

### **Effect of support on selectivity and on-stream stability of surface VO<sub>x</sub> species in non-oxidative propane dehydrogenation**

S. Sokolov, M. Stoyanova, U. Rodemerck, D. Linke, and E. V. Kondratenko<sup>†</sup>

Leibniz-Institut für Katalyse e. V. an der Universität Rostock, Albert-Einstein-Str. 29 A D-18059 Rostock, Germany

<sup>†</sup>Corresponding author: Phone: (+)49-(0)-381-1281-290, fax: (+)49-(0)-381-1281-51290,  
E-mail: [evgenii.kondratenko@catalysis.de](mailto:evgenii.kondratenko@catalysis.de)

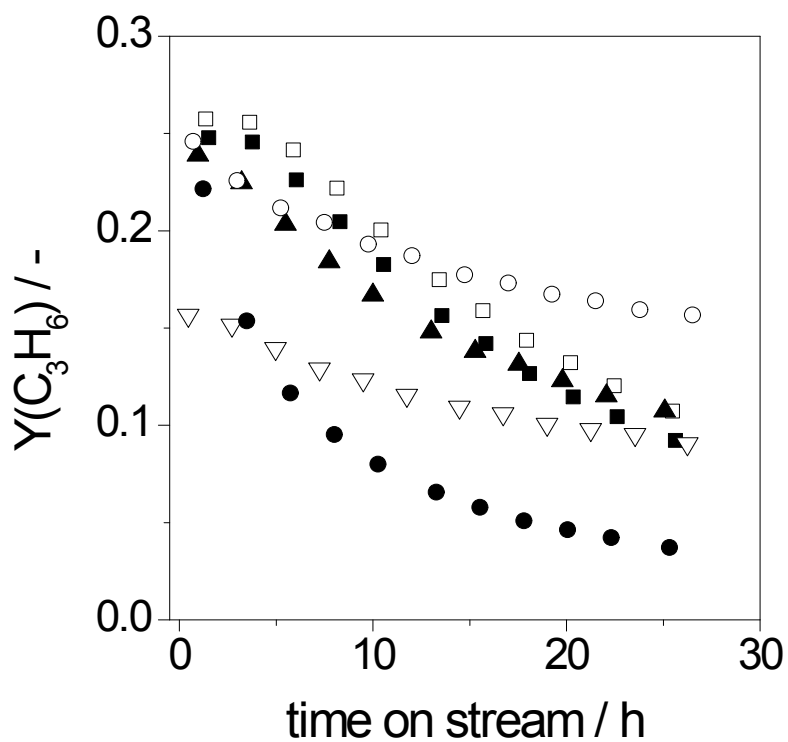

Fig. S 1 Propene yield with time on stream in 27-h dehydrogenation test: VO<sub>x</sub>/MCM-41 (□), VO<sub>x</sub>/S1 (●), VO<sub>x</sub>/S10 (●), VO<sub>x</sub>/S40 (■), VO<sub>x</sub>/S70 (♦), and VO<sub>x</sub>/Al<sub>2</sub>O<sub>3</sub> (▽). Reaction conditions: 550 °C, C<sub>3</sub>H<sub>8</sub>/N<sub>2</sub> = 40/60, GHSV = 1200 Lh<sup>-1</sup>kg<sup>-1</sup>.

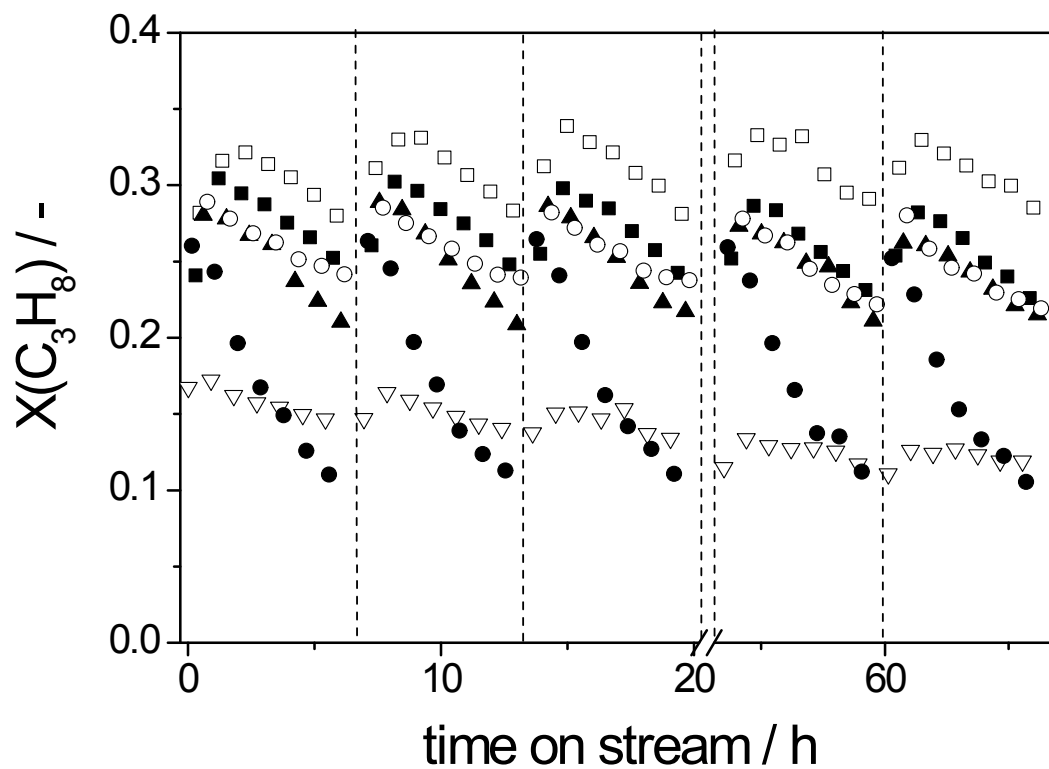

Fig. S 2 Propane conversion in the first three and the last two DH/regeneration cycles from a series of 10 cycles on:  $\text{VO}_x/\text{MCM-41}$  ( $\square$ ),  $\text{VO}_x/\text{S1}$  ( $\circ$ ),  $\text{VO}_x/\text{S10}$  ( $\bullet$ ),  $\text{VO}_x/\text{S40}$  ( $\square$ ),  $\text{VO}_x/\text{S70}$  ( $\blacktriangle$ ), and  $\text{VO}_x/\text{Al}_2\text{O}_3$  ( $\nabla$ ). Reaction conditions: 550 °C,  $\text{C}_3\text{H}_8/\text{N}_2 = 40/60$ , GHSV = 1200  $\text{Lh}^{-1}\text{kg}^{-1}$ .

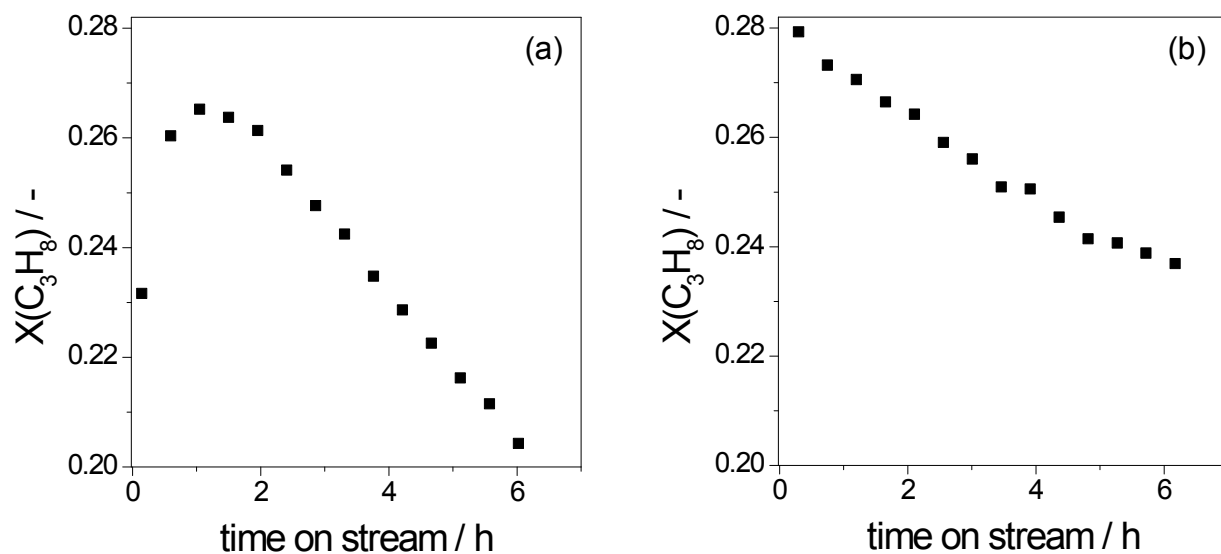

Fig. S 3 Conversion of propane with time on stream over  $\text{VO}_x/\text{S40}$  (a) and  $\text{VO}_x/\text{MCM-41}$  (b) during 6-h DH test (sampling was done every 27 min). Reaction conditions: 550 °C,  $\text{C}_3\text{H}_8/\text{N}_2 = 40/60$ , GHSV = 1200  $\text{Lh}^{-1}\text{kg}^{-1}$ .

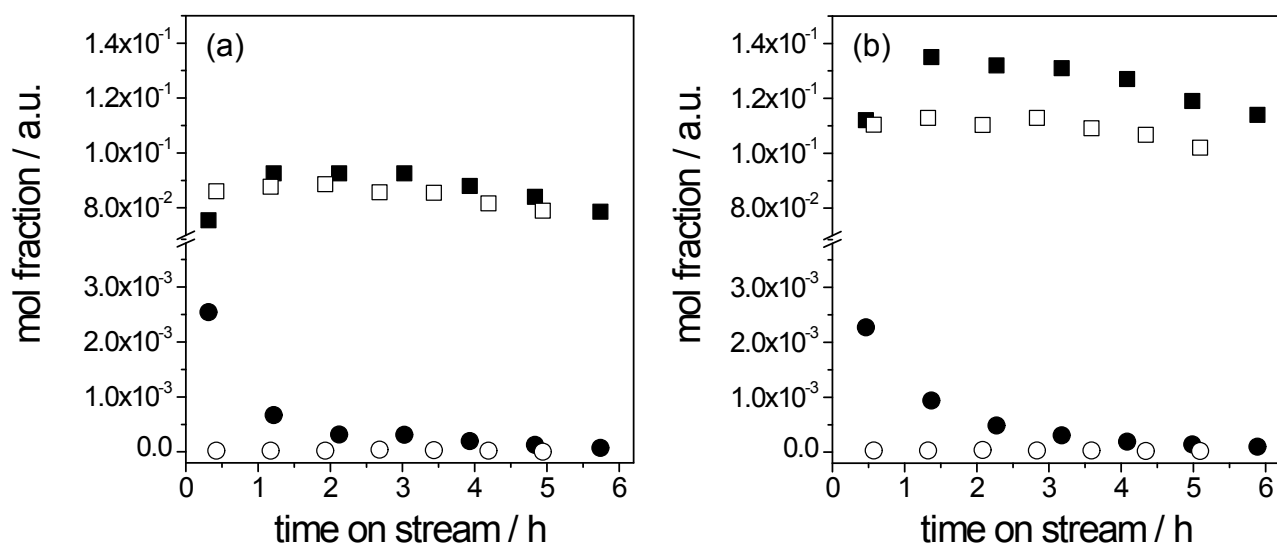

Fig. S 4 Molar fractions of H<sub>2</sub> (●, ○) and CO<sub>x</sub> (◼, ◻) formed over oxidized (closed symbols) and reduced (open symbols) VO<sub>x</sub>/S1 (a) and VO<sub>x</sub>/S10 (b) during 6-h DH test. Reaction conditions: 550 °C, C<sub>3</sub>H<sub>8</sub>/N<sub>2</sub> = 40/60, GHSV = 1200 Lh<sup>-1</sup>kg<sup>-1</sup>.

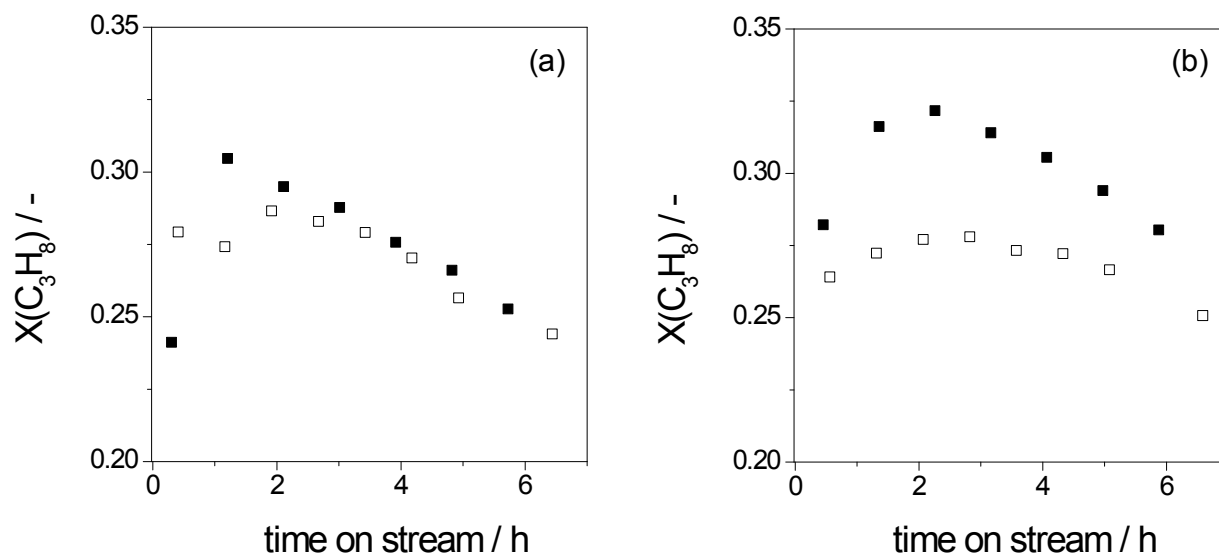

Fig. S 5 Conversion of propane with time on stream on oxidized (○) and reduced (●)  $\text{VO}_x/\text{S1}$  (a) and  $\text{VO}_x/\text{S10}$  (b). Reaction conditions: 550 °C,  $\text{C}_3\text{H}_8/\text{N}_2 = 40/60$ , GHSV = 1200  $\text{Lh}^{-1}\text{kg}^{-1}$ .
